# Supplementary material for: Improved Stability and Catalytic Efficiency of ω-Transaminase in Aqueous Mixture of Deep Eutectic Solvents
Source: MDPI journal article supplement (doi:10.3390/molecules28093895), 2023-05-05
Supplement: s1 [file s1]

# Improved Stability and Catalytic Efficiency of $\omega$ -Transaminase in Aqueous Mixture of Deep Eutectic Solvents

Hongpeng Wang<sup>1,†</sup>, Mercy V. Masuku<sup>1,†</sup>, Yachen Tao<sup>1</sup>, Jiayao Yang<sup>1</sup>,  
Yi Kuang<sup>2</sup>, Changjiang Lyu<sup>1</sup>, Jun Huang<sup>1\*</sup>, Shengxiang Yang<sup>2\*</sup>

<sup>1</sup>Zhejiang Provincial Key Lab for Chemical and Biological Processing Technology of Farm Product, School of Biological and Chemical Engineering, Zhejiang University of Science and Technology, Hangzhou 310023, China.

<sup>2</sup> Zhejiang Provincial Key Laboratory of Chemical Utilization of Forestry Biomass, Zhejiang A&F University, Hangzhou 311300, China.

\*Corresponding author:

Jun Huang

E-mail: huangjun@zust.edu.cn

Shengxiang Yang

E-mail: shengxiangyang2000@zafu.edu.cn

† These authors contributed equally to this work.

**Table S1.** The factors and response used to plot the three-dimensional response surface plots.

| <b>Standard</b> | <b>Run</b> | <b>Factor 1<br/>A:<br/>Concentration<br/>(%)</b> | <b>Factor 2<br/>B: pH</b> | <b>Factor 3<br/>C: Temperature<br/>(°C)</b> | <b>Response 1<br/>Specific<br/>activity<br/>(U/mg)</b> |
|-----------------|------------|--------------------------------------------------|---------------------------|---------------------------------------------|--------------------------------------------------------|
| 13              | 1          | 10.00                                            | 8.00                      | 40.00                                       | 2.61232                                                |
| 9               | 2          | 10.00                                            | 7.00                      | 35.00                                       | 1.20977                                                |
| 16              | 3          | 10.00                                            | 8.00                      | 40.00                                       | 2.47542                                                |
| 8               | 4          | 20.00                                            | 8.00                      | 45.00                                       | 0.70641                                                |
| 10              | 5          | 10.00                                            | 9.00                      | 35.00                                       | 1.03529                                                |
| 6               | 6          | 20.00                                            | 8.00                      | 35.00                                       | 1.27386                                                |
| 1               | 7          | 0.00                                             | 7.00                      | 40.00                                       | 1.32237                                                |
| 12              | 8          | 10.00                                            | 9.00                      | 45.00                                       | 0.678203                                               |
| 17              | 9          | 10.00                                            | 8.00                      | 40.00                                       | 2.65764                                                |
| 4               | 10         | 20.00                                            | 9.00                      | 40.00                                       | 0.742966                                               |
| 14              | 11         | 10.00                                            | 8.00                      | 40.00                                       | 2.53591                                                |
| 11              | 12         | 10.00                                            | 7.00                      | 45.00                                       | 1.13618                                                |
| 5               | 13         | 0.00                                             | 8.00                      | 35.00                                       | 0.76295                                                |
| 7               | 14         | 0.00                                             | 8.00                      | 45.00                                       | 0.890177                                               |
| 15              | 15         | 10.00                                            | 8.00                      | 40.00                                       | 2.66573                                                |
| 2               | 16         | 20.00                                            | 7.00                      | 40.00                                       | 0.323813                                               |
| 3               | 17         | 0.00                                             | 9.00                      | 40.00                                       | 0.20329                                                |

**Table S2.** The analysis of variance (ANOVA) for the quadratic model of the enzymatic activity of the  $\omega$ -TA.

| Source                    | Sum of Squares | Degree of Freedom | Mean Square | F-Value | <i>p</i> -value<br>Prob > F | Significance Level |
|---------------------------|----------------|-------------------|-------------|---------|-----------------------------|--------------------|
| Model                     | 11.93          | 9                 | 1.33        | 88.63   | <0.0001                     | significant        |
| A-DES Conc                | 2.169E-003     | 1                 | 2.169E-003  | 0.15    | 0.7146                      |                    |
| B-pH                      | 0.22           | 1                 | 0.22        | 14.84   | 0.0063                      |                    |
| C-Temp                    | 0.095          | 1                 | 0.095       | 6.34    | 0.0399                      |                    |
| AB                        | 0.59           | 1                 | 0.59        | 39.56   | 0.004                       |                    |
| AC                        | 0.12           | 1                 | 0.12        | 8.07    | 0.0250                      |                    |
| BC                        | 0.020          | 1                 | 0.020       | 1.34    | 0.2844                      |                    |
| A <sup>2</sup>            | 4.41           | 1                 | 4.41        | 295.21  | <0.0001                     |                    |
| B <sup>2</sup>            | 3.54           | 1                 | 3.54        | 236.98  | <0.0001                     |                    |
| C <sup>2</sup>            | 1.82           | 1                 | 1.82        | 121.60  | <0.0001                     |                    |
| Residual                  | 0.10           | 7                 | 0.015       |         |                             |                    |
| Lack of Fit               | 0.078          | 3                 | 0.026       | 3.86    | 0.1123                      | not significant    |
| Pure error                | 0.027          | 4                 | 6.715E-003  |         |                             |                    |
| Cor Total                 | 12.03          | 16                |             |         |                             |                    |
| <i>R</i> <sup>2</sup>     |                |                   | 0.9913      |         |                             |                    |
| Adj <i>R</i> <sup>2</sup> |                |                   | 0.9801      |         |                             |                    |
|                           |                |                   | 26.400      |         |                             |                    |

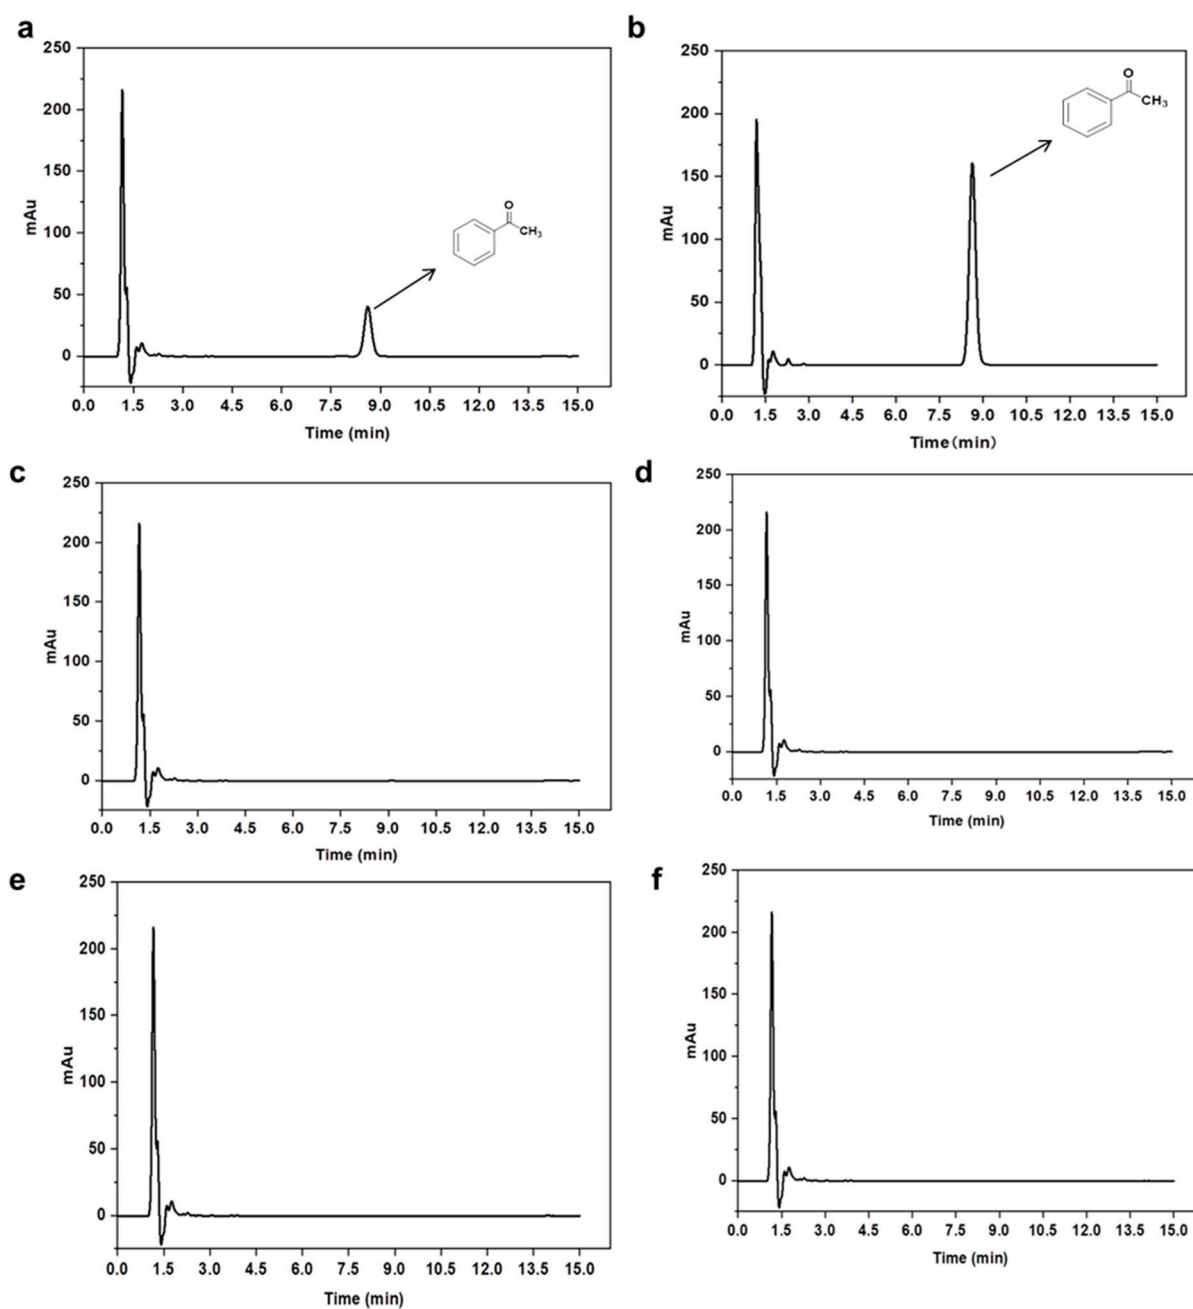

**Figure S1.** HPLC analysis of the enzymatic product (acetophenone). **(a)** HPLC analysis of the enzymatic product in the phosphate buffer; **(b)** HPLC analysis of the enzymatic product in aqueous deep eutectic solvent (ChCl:EG:PG); **(c)** HPLC analysis of the sample containing aqueous solution of ChCl:EG:PG without the enzyme; **(d)** HPLC analysis of the sample containing ChCl without the enzyme; **(e)** HPLC analysis of the sample containing aqueous solution of EG without the enzyme **(f)** HPLC analysis of the sample containing aqueous solution of EG without the enzyme.

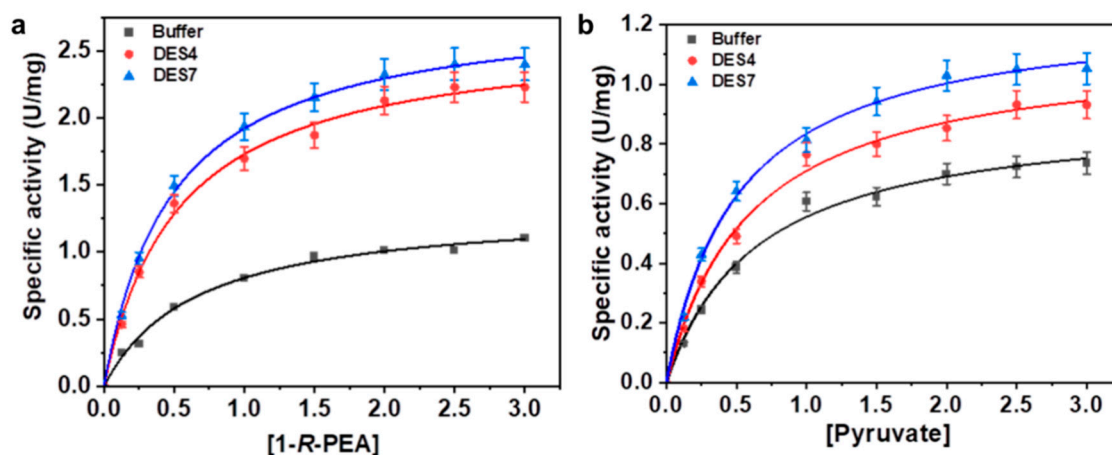

**Figure S2.** Determination of the kinetic parameters of the  $\omega$ -TA by varying 1-R-PEA concentration (a) and varying pyruvate concentration (b).

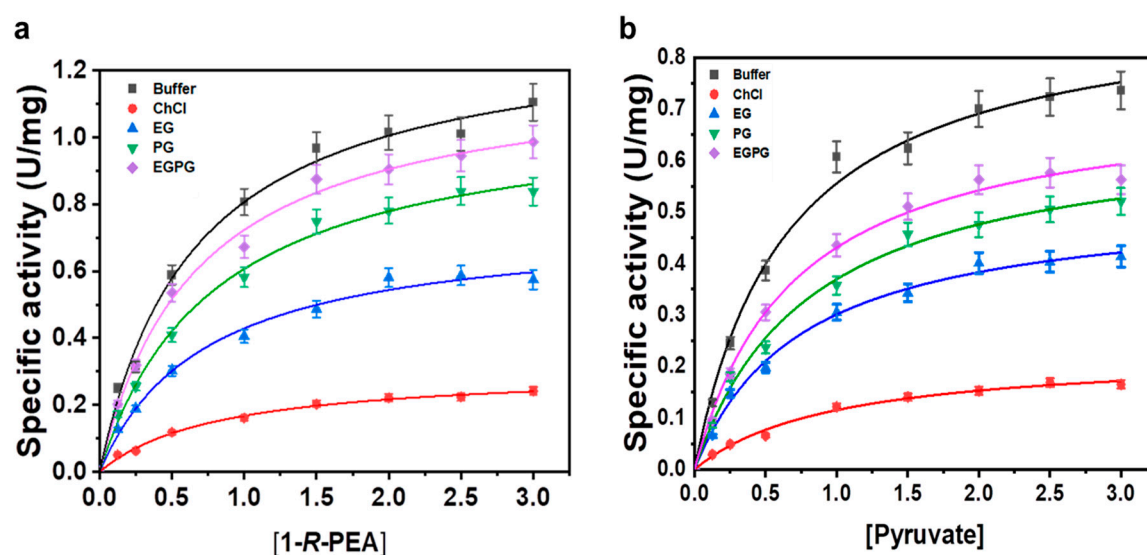

**Figure S3.** Determination of the kinetic parameters of the  $\omega$ -TA with 10% (v/v) DES constituents using varying 1-R-PEA (a) and pyruvate (b).

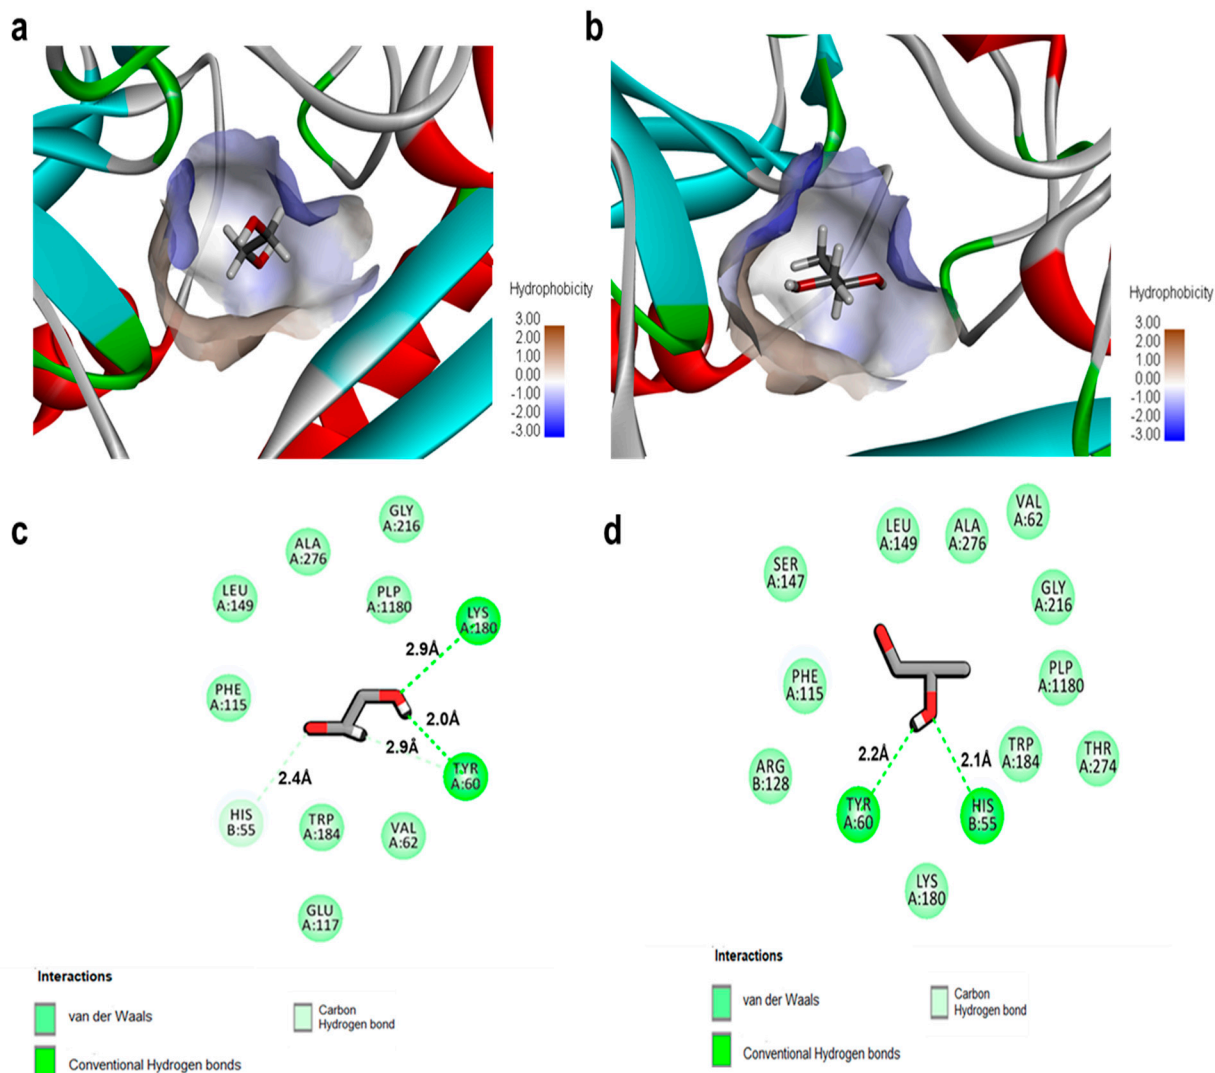

**Figure S4.** (a) Docking poses of enzyme with EG and PG; (b) at the lowest absolute affinity values. (c) Molecular diagrams of the interaction between EG and PG (d) with amino acid residues.
